# Supplementary material
Source: PubMed Central journal article supplement (PMC6657798)
Supplement: NIHMS1030739-supplement-supp_1.pdf [file NIHMS1030739-supplement-supp_1.pdf]

**Supplemental Data**

**Supplemental Table 1**

**Insulin Adjustment Protocol**

| Mean FPG                                        | Glargine adjustment                            |
|-------------------------------------------------|------------------------------------------------|
| 100-140 mg/dL                                   | No Change                                      |
| 140-180 mg/dL                                   | Increase daily dose by 2 units or 10%          |
| >180 mg/dL                                      | Increase daily dose by 4 units or 20%          |
| <b>Glargine adjustment for BG &lt;100 mg/dL</b> |                                                |
| If any FBG 70-99 mg/dL                          | Decrease by 4 units or 10% of total daily dose |
| If any FBG or RBG <70 mg/dL                     | Decrease by 8 units or 20% of total daily dose |
| If any FBG or RBG <40 mg/dL                     | Decrease total daily dose by 30-40%            |

Abbreviations:  
 BG = blood glucose ; FPG = fasting plasma glucose ; RBG= random plasma glucose
