# Supplementary material
Source: PubMed Central journal article supplement (PMC6657798)
Supplement: NIHMS1030739-supplement-supp_2.pdf [file NIHMS1030739-supplement-supp_2.pdf]

**Supplemental Table 2**

| <b>Variable</b>                                        | <b>HbA1c &lt;7%<br/>(n = 68)</b> | <b>7% ≤ HbA1c ≤ 9%<br/>(n = 98)</b> | <b>HbA1c &gt;9%<br/>(n = 87)</b> | <b><i>P</i></b> |
|--------------------------------------------------------|----------------------------------|-------------------------------------|----------------------------------|-----------------|
| Adherence to glucose monitoring, 3 <sup>rd</sup> month | 33 (49%)                         | 54 (55%)                            | 52 (60%)                         | .38             |
| Adherence to glucose monitoring, 6 <sup>th</sup> month | 30 (44%)                         | 48 (49%)                            | 50 (57%)                         | .24             |
