# Supplementary material
Source: PubMed Central journal article supplement (PMC6657798)

**Consort diagram** - enrollment in SITA HOSPITAL and SITA DISCHARGE trial.

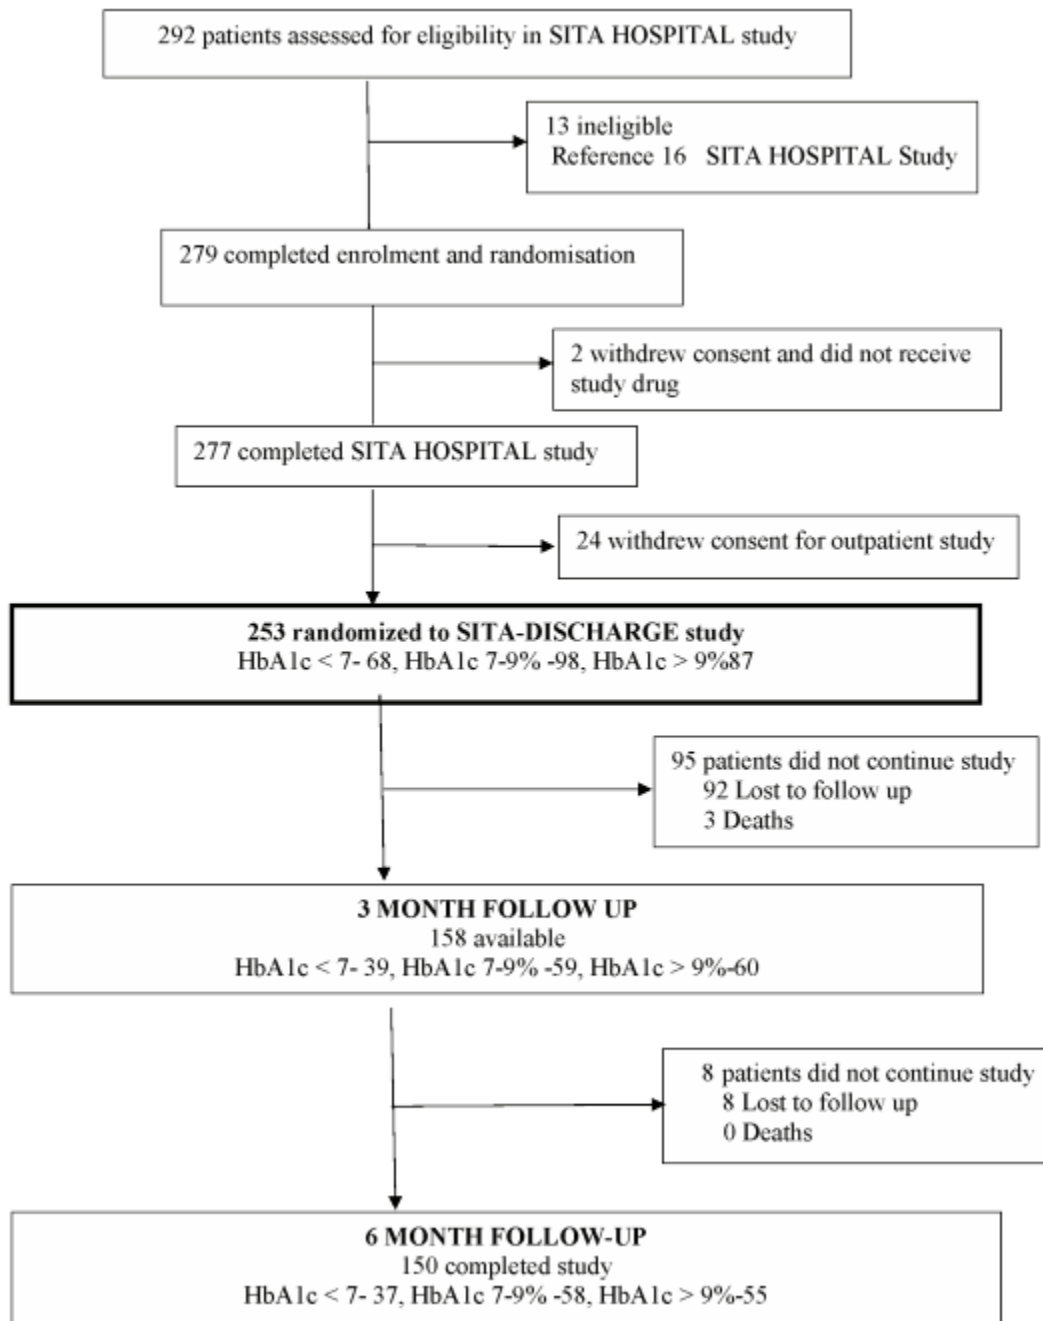

Supplement: NIHMS1030739-supplement-supp_3.pdf [file NIHMS1030739-supplement-supp_3.pdf]
